# Supplementary material
Source: PubMed Central journal article supplement (PMC4702570)
Supplement: JVI.02318-15_zjv999091102so1.pdf [file JVI.02318-15_zjv999091102so1.pdf]

1  
2  
3  
4  
5  
6  
7  
8  
9  
10  
11  
12  
13

**SUPPLEMENTAL FIGURES**

**Identification of *MEF2B*, *EBF1*, and *IL6R* as direct gene targets of EBNA1 critical for EBV-infected B-lymphocyte survival**

Italo Tempera<sup>2</sup>, Alessandra De Leo<sup>1</sup>, Andrew Kossenkov<sup>1</sup>, Matteo Cesaroni<sup>2</sup>, Hui Song<sup>1</sup>, Noor Dawaney<sup>1</sup>, Louise Showe<sup>1</sup>, Fang Lu<sup>1</sup>, Priyankara Wikramasinghe<sup>1</sup>, and Paul M. Lieberman<sup>1,3</sup>

14 **Supplementary Figures**

15

16 **Supplemental Figure S1.** ChIP-Seq profile of EBNA1 binding to OriP in 4 different EBV positive  
17 cell lines. Note EBNA1 binding to DS relative to FR is different among the cell types.  
18

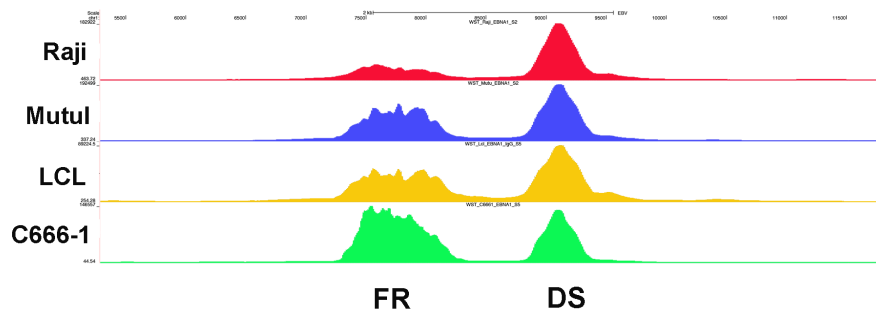

19  
20  
21  
22  
23  
24

**Supplemental Figure S2.** ChIP Seq profiles of EBNA1 cellular genes for (A) RNF145/EBF1, (B) CDC7, (C) LAIR1, and (D) KDM4C.

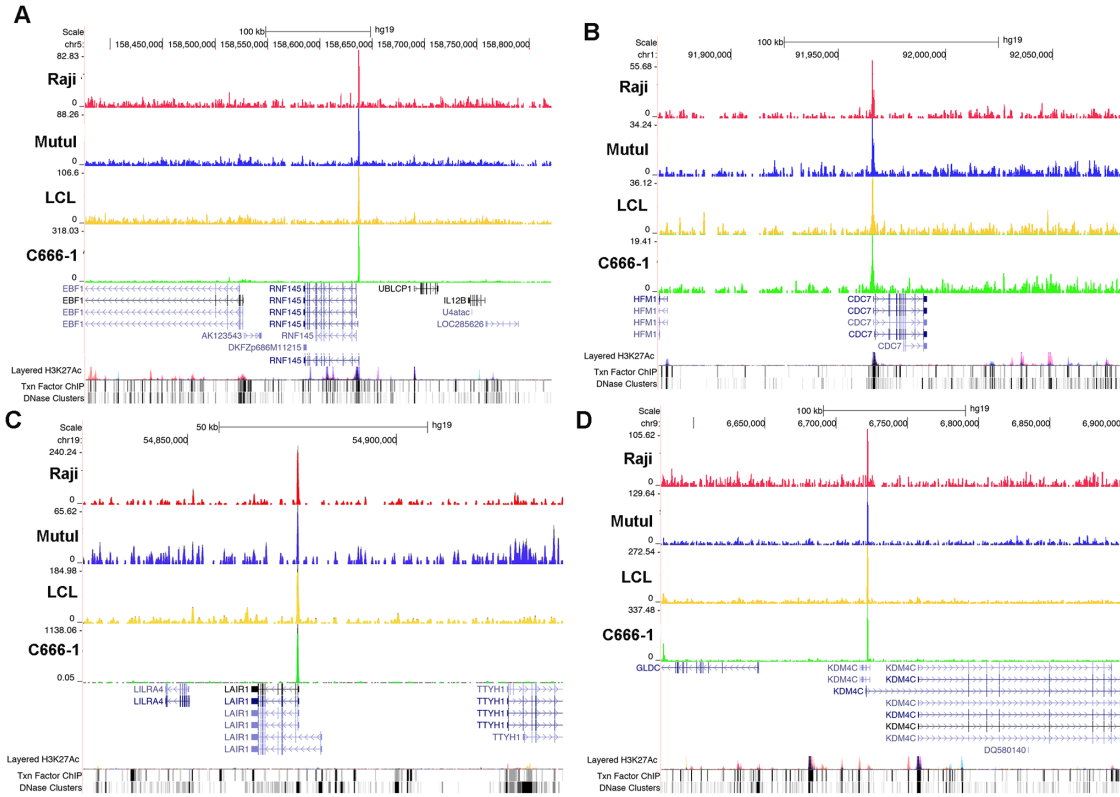

25  
26  
27  
28  
29

30  
31  
32  
33**TABLE S1. List of shRNA targeting sequences and clones from TRC library.**

|            |                                                                              |
|------------|------------------------------------------------------------------------------|
| shEBNA1.1+ | CCGG AA GGG TAG AGG ACG TGA AAG A CTCGAG T CTT TCA CGT CCT CTA CCC TT TTTTGG |
| shEBNA1.1- | AATTCAAAAA AA GGG TAG AGG ACG TGA AAG A CTCGAG T CTT TCA CGT CCT CTA CCC TT  |
| shEBNA1.2+ | CCGG AA GAA CAT TGC AGA AGG TTT A CTCGAG T AAA CCT TCT GCA ATG TTC TT TTTTGG |
| shEBNA1.2- | AATTCAAAAA AA GAA CAT TGC AGA AGG TTT A CTCGAG T AAA CCT TCT GCA ATG TTC TT  |
| shEBNA1.3+ | CCGGAAGGATCAGGGCCAAGACATACTCGAGTATGTCTTGGCCCTGATCCTTTTTTTTG                  |
| shEBNA1.3- | AATTCAAAAAAAGGATCAGGGCCAAGACATACTCGAGTATGTCTTGGCCCTGATCCTT                   |
| shEBNA1.4+ | CCGGAATGGAAAGCATCGTGGTCAACTCGAGTTGACCACGATGCTTTCCATTTTTTTTG                  |
| shEBNA1.4- | AATTCAAAAAAATGGAAAGCATCGTGGTCAACTCGAGTTGACCACGATGCTTTCCATT                   |
| shEBNA1.5+ | CCGGAACGGAGATGACGGAGATGAACTCGAGTTCATCTCCGTCATCTCCGTTTTTTTTG                  |
| shEBNA1.5- | AATTCAAAAAACGGAGATGACGGAGATGAACTCGAGTTCATCTCCGTCATCTCCGTT                    |
| shMEF2B.1  | TRCN0000015738                                                               |
| shMEF2B.2  | TRCN0000015742                                                               |
| shIL6R-1   | TRNC0000058778                                                               |
| shIL6R-2   | TRNC0000058782                                                               |
| shEBF1-1   | TRCN0000013831                                                               |
| shEBF1-2   | TRCN0000013828                                                               |
